# Supplementary material for: Characterization of Two Highly Arsenic-Resistant Caulobacteraceae Strains of Brevundimonas nasdae: Discovery of a New Arsenic Resistance Determinant
Source: MDPI journal article supplement (doi:10.3390/ijms23105619), 2022-05-17
Supplement: s1 [file s1]

## Supplementary data

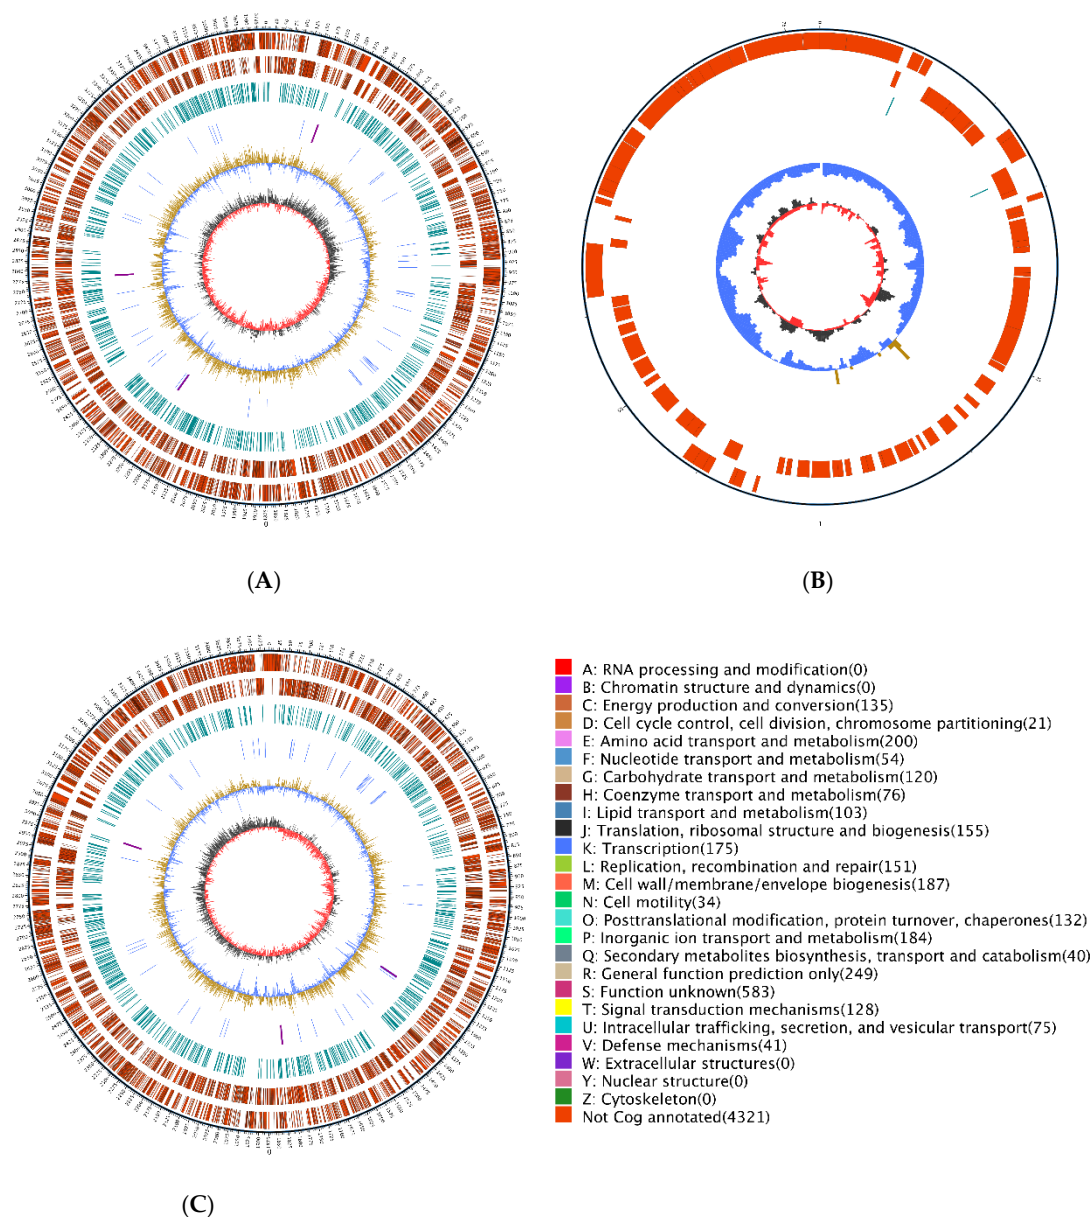

**Figure S1.** Circular map of the complete genome of *B. nasdae* Au-Bre29 and Au-Bre30. (A) Chromosome of Au-Bre29, (B) Plasmid of Au-Bre29 and (C) Chromosome of Au-Bre30. Circles from the outwards to inwards, ring 1: genome size (Kb); ring 2 and 3: genes existing on the Forward strand and Reverse strand, with different color indicate genes with different COG function; ring 4: repetitive sequence; ring 5: tRNA(blue) and rRNA(purple); ring 6: GC-content, with blue indicating the region with GC-content higher than average, light yellow indicate the region with GC-content lower than average; ring 7: GC-skew.

**Table S1.** General genomic feature of *B. nasdae* Au-Bre29 and Au-Bre30

| <b>Genomic contents</b>                    | <b><i>B. nasdae</i> Au-Bre29</b> | <b><i>B. nasdae</i> Au-Bre30</b> |
|--------------------------------------------|----------------------------------|----------------------------------|
| <b>Bio Project Number</b>                  | PRJNA744386                      | PRJNA744387                      |
| <b>NCBI Accession</b>                      | NZ_CP080034.1<br>NZ_CP080035.1   | NZ_CP080036.1                    |
| <b>Chromosome</b>                          | 1 (3.747438 Mb)                  | 1 (3.746705 Mb)                  |
| <b>Plasmid</b>                             | 1 (0.076784 Mb)                  | 0                                |
| <b>G+C content (%)</b>                     | 65.69%                           | 65.8%                            |
| <b>Genome size (Mp)</b>                    | 3.8251164                        | 3.746705                         |
| <b>Total CDS</b>                           | 3665                             | 3577                             |
| <b>Total tRNAs</b>                         | 53                               | 53                               |
| <b>Total Genes</b>                         | 3731                             | 3643                             |
| <b>Protein coding genes</b>                | 3618                             | 3531                             |
| <b>Genes with function prediction</b>      | 3531                             | 3474                             |
| <b>Genes assigned to KEGGs</b>             | 1772                             | 1751                             |
| <b>Genes with signal peptides</b>          | 531                              | 523                              |
| <b>Genes assigned to VFDB (Virulence)</b>  | 670                              | 668                              |
| <b>Clustered gene</b>                      | 8                                | 9                                |
| <b>Gene encoding transport protein</b>     | 888                              | 882                              |
| <b>Gene encoding secreted protein</b>      | 531                              | 523                              |
| <b>Genes assigned to CARD (Antibiotic)</b> | 8                                | 6                                |
| <b>Genes assigned to TCDB (Transport</b>   | 888                              | 875                              |

|                                     |               |               |
|-------------------------------------|---------------|---------------|
| <b>Genes assigned to CAZy (EPS)</b> | 139           | 138           |
| <b>CRISPR</b>                       | 3             | 2             |
| <b>GIs</b>                          | 9             | 9             |
| <b>Prophage</b>                     | 5             | 4             |
| <b>Phage</b>                        | 3(1/3 intact) | 3(1/3 intact) |

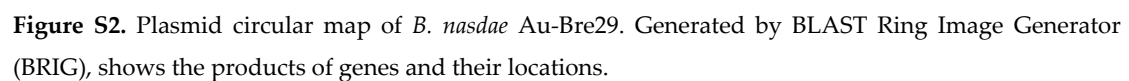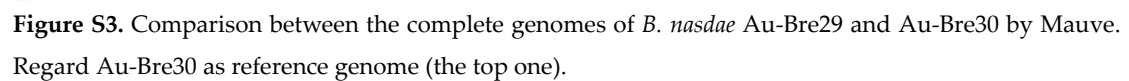

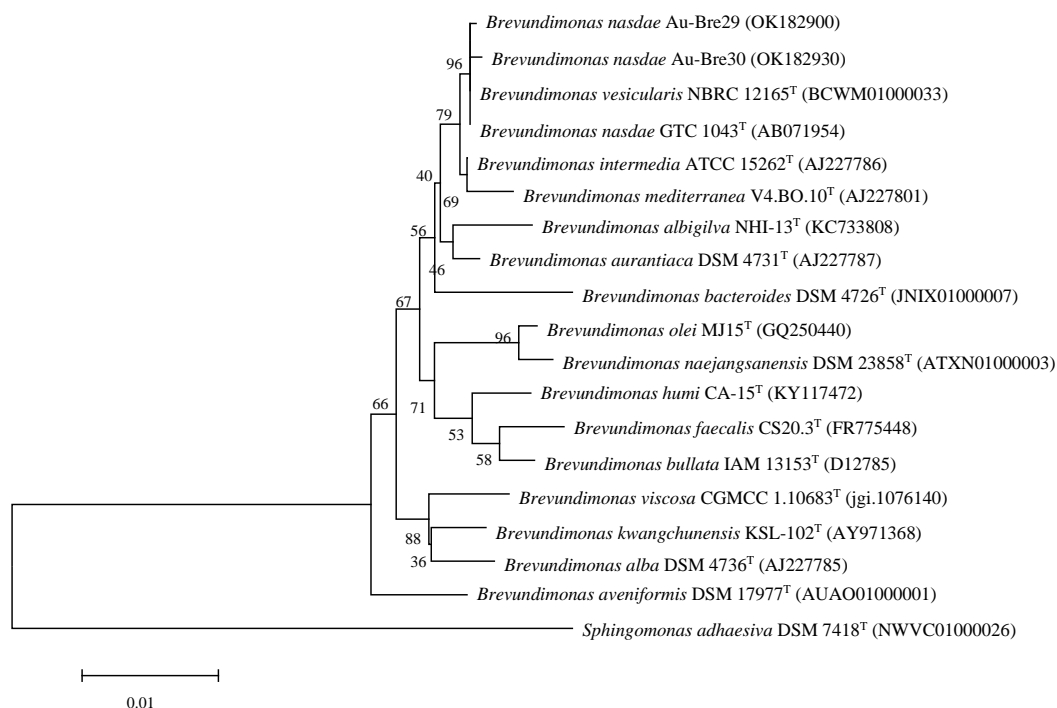

**Figure S4.** Neighbor-joining phylogenetic tree constructed based on the 16S rRNA gene sequences. Showing the phylogenetic relationships between strains *Brevundimonas nasdae* Au-Bre29 and Au-Bre30 and other species in the genus *Brevundimonas*. Values indicate percentages of identical branching in 1000 bootstrap replications. The sequence of *Sphingomonas adhaesiva* DSM 7418<sup>T</sup> was used as an out-group. Bar, 0.01 substitutions per nucleotide position.
